# Supplementary material
Source: publisher figshare collection journal article supplement (https://brill.figshare.com/articles/dataset/_/12110205)
Supplement: Supplementary file 1 [file 2]

# **Cross-Modal Correspondence Between Tonal Hierarchy and Visual Brightness: Associating Syntactic Structure and Perceptual Dimensions Across Modalities**

**Neta B. Maimon** <sup>1,\*</sup>, **Dominique Lamy** <sup>1,2</sup> and **Zohar Eitan** <sup>3</sup>

<sup>1</sup> The School of Psychological Sciences, Tel Aviv University, POB 39040, Tel Aviv 69978, Israel

<sup>2</sup> The Sagol School of Neuroscience, Tel Aviv University, POB 39040, Tel Aviv 69978, Israel

<sup>3</sup> Buchman-Mehta School of Music, Tel Aviv University, POB 39040, Tel Aviv 69978, Israel

Received 21 July 2019; accepted 2 March 2020

\* To whom correspondence should be addressed. E-mail: [netacello@gmail.com](mailto:netacello@gmail.com)

**Supplementary Material**

**Audio S1.** Examples of stable (A) and unstable (B) auditory stimuli used in experiments 1A and 1B. Both examples consist of a cadence type context element (a sequence of three chords), followed by either a stable (A) or an unstable (B) probe.

**A**

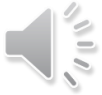

[Link to download S1A.mp3](#)

**B**

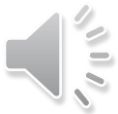

[Link to download S1B.mp3](#)

Frequency (Hz) increases

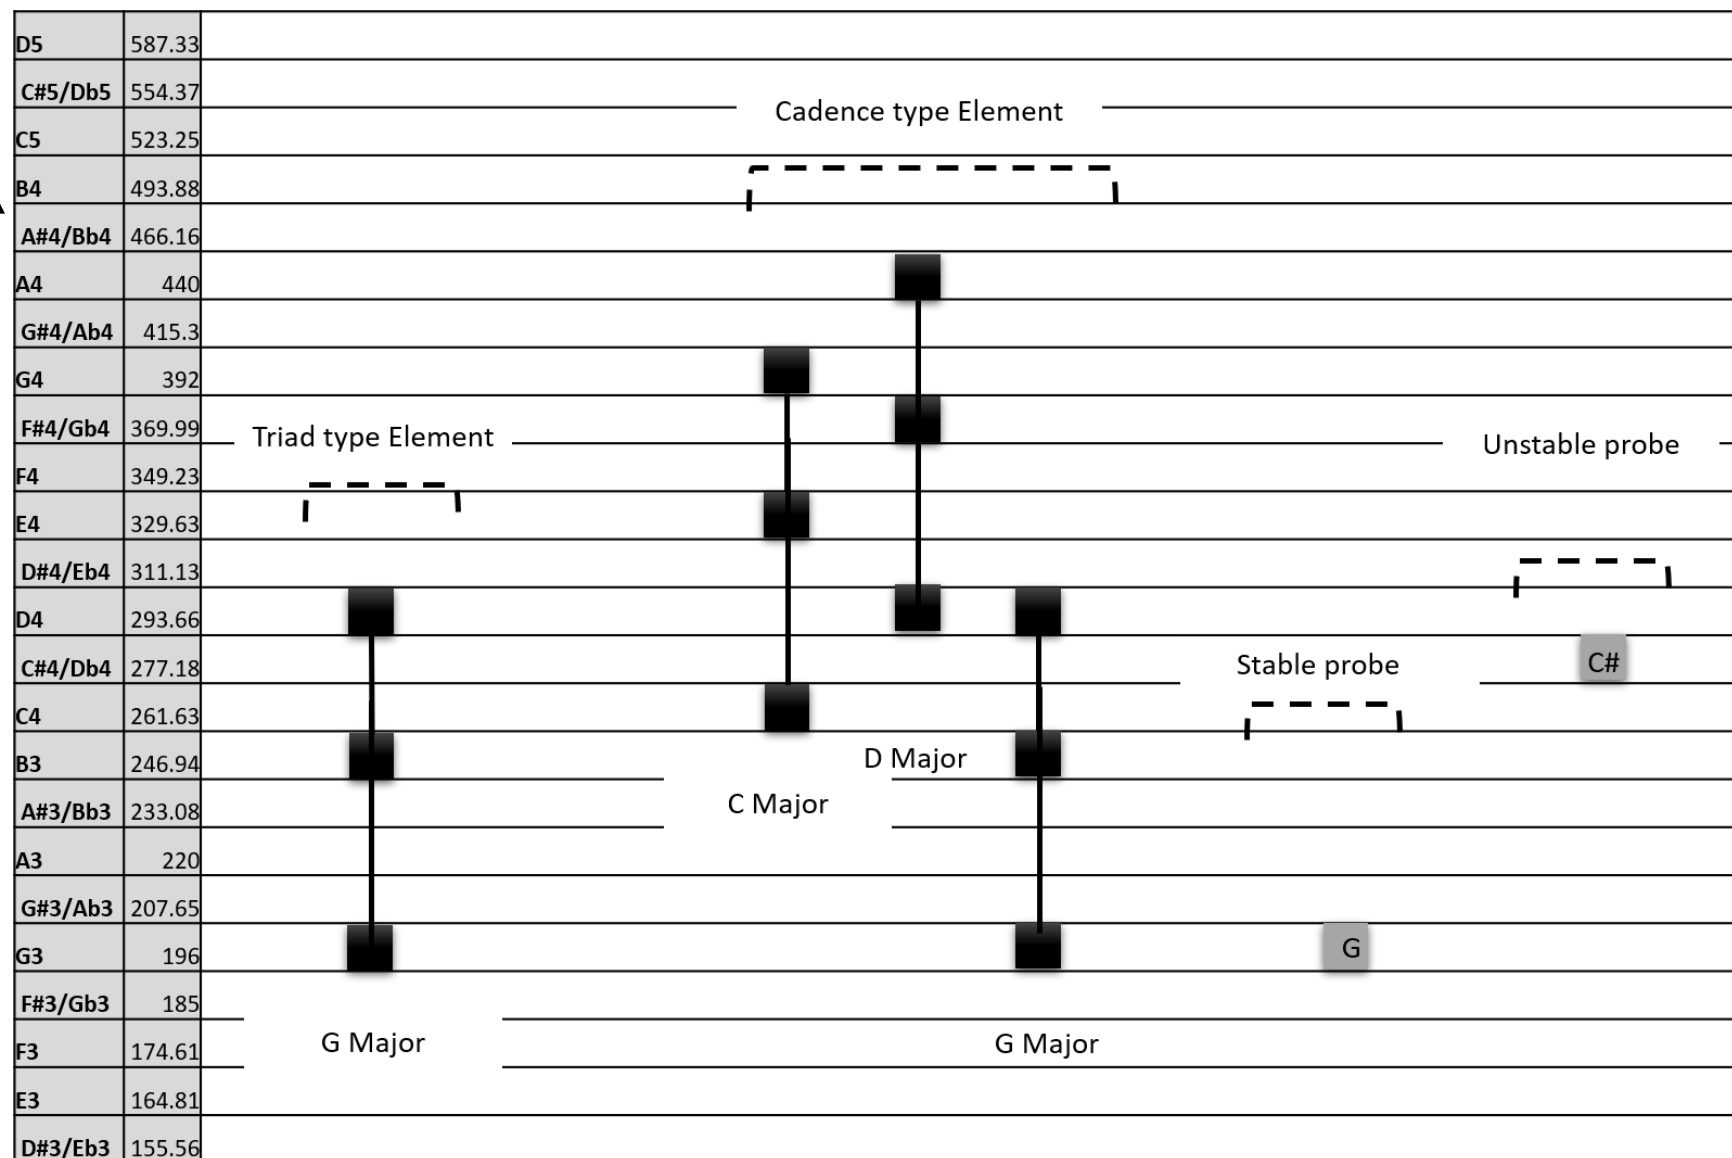

**Figure S1.** Schematic presentation of the auditory stimuli used in experiments 1A and 1B (probe-tone method), in G Major (2A) and in D flat Major (2B). Each black box is a note, and the lines connecting the notes create a chord. The example shows a triad element and a cadence context element (a sequence of three chords), followed by an example of stable or unstable probe. In this example, the elements are in G major key, the stable probe is the note G (the first scale degree, the most stable tone). The unstable probe is C# (the augmented fourth degree, the tritone, which does not belong to the key, and is thus unstable). Note that for the sake of clarity, each note in this schematic representation is represented by a single frequency. Stimuli used in this experiment, however, were Shepard tones (Shepard, 1974), in which each pitch-class is created by 5 sine-tones separated by octaves.

Frequency (Hz) increases

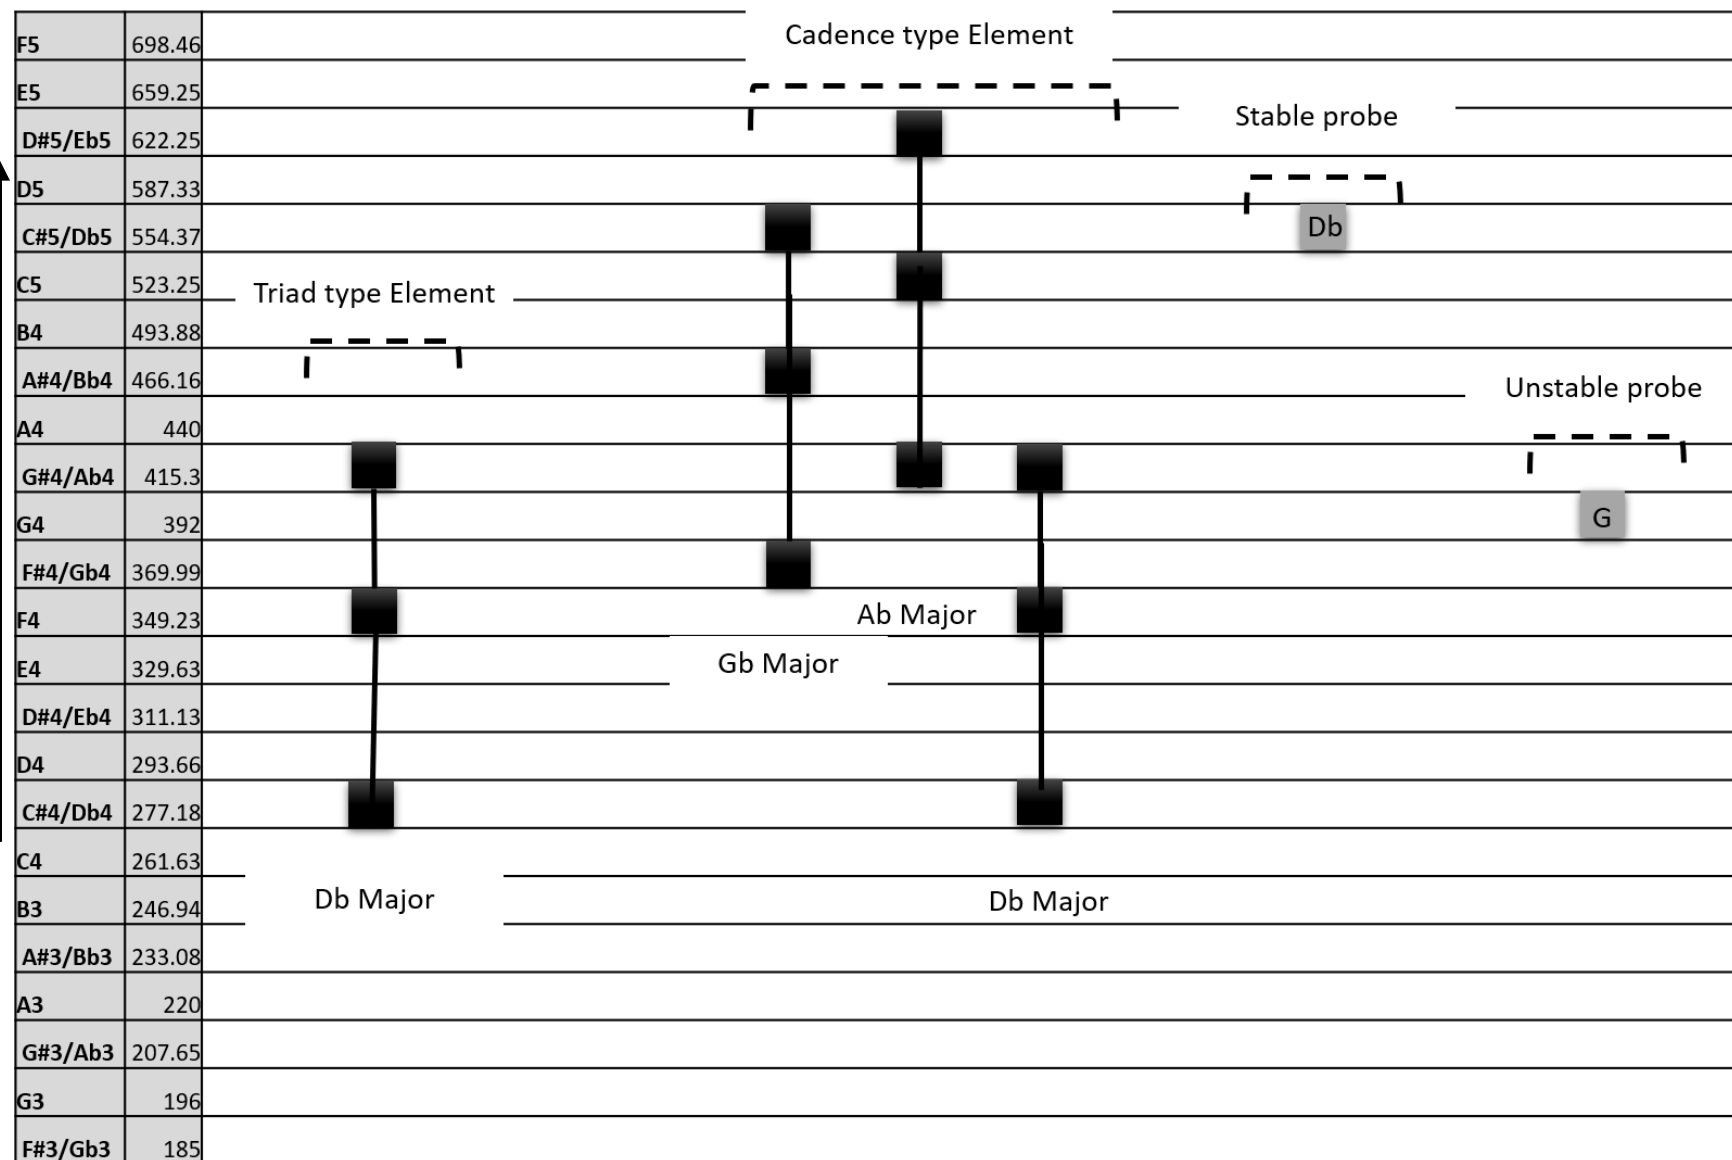

**Figure S2.** Schematic presentation of the auditory stimuli used in experiments 1A and 1B (probe-tone method). Each black box is a note, and the lines connecting the notes create a chord. The example shows a triad element, a cadence context element (a sequence of three chords), followed by an example of stable or unstable probe. In this example, the elements are in D flat major key, the stable probe is the note D flat (the first scale degree, the most stable tone). The unstable probe is G (the augmented fourth degree, the tritone, which does not belong to the scale, the least stable). Note that for the sake of clarity, each note in this schematic representation is represented by a single frequency. Stimuli used in this experiment, however, were Shepard tones (Shepard, 1974), in which each pitch-class is created by 5 sine-tones separated by octaves.

**Audio S2.** Examples of stable (A) and unstable (B) auditory stimuli used in Experiment 2. Stimuli consist of a sequence of three chords followed by either a stable (A) or an unstable (B) tone.

**A**

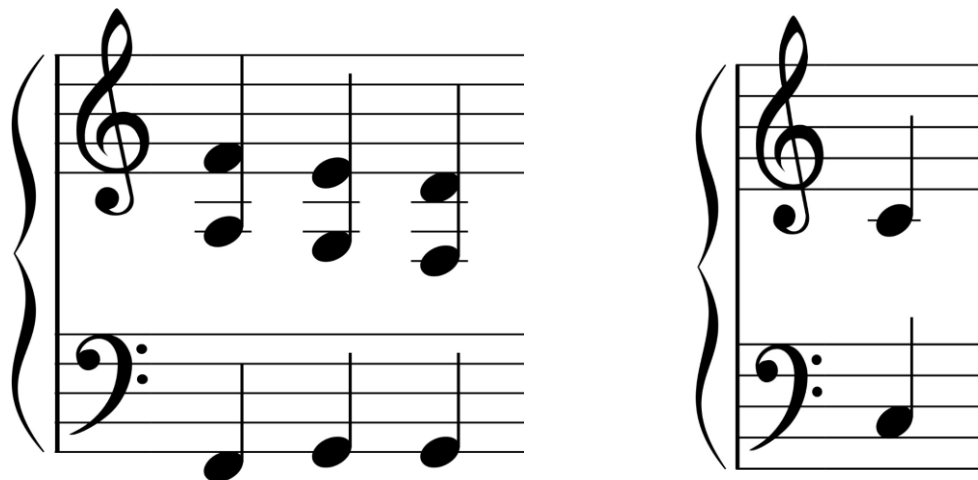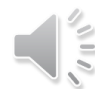

[Link to download S2A.mp3](#)

**B**

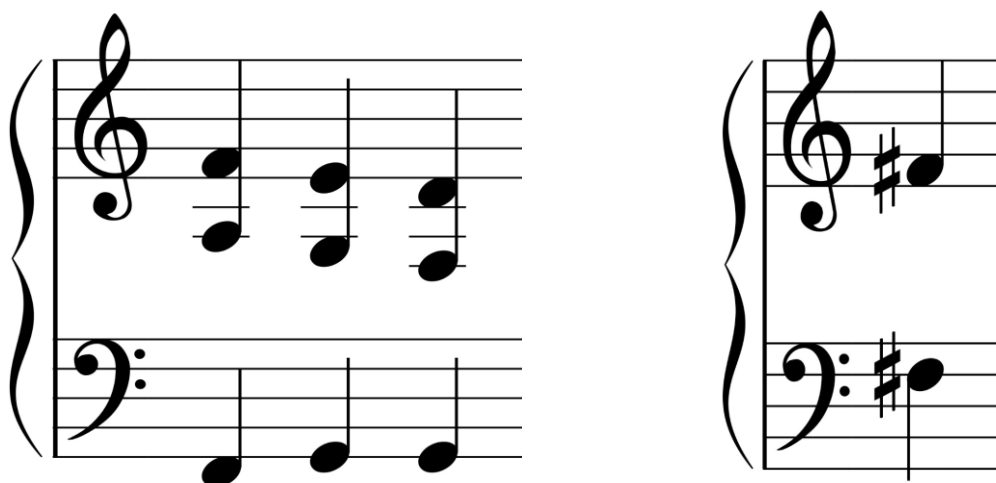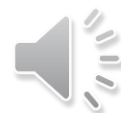

[Link to download S2B.mp3](#)

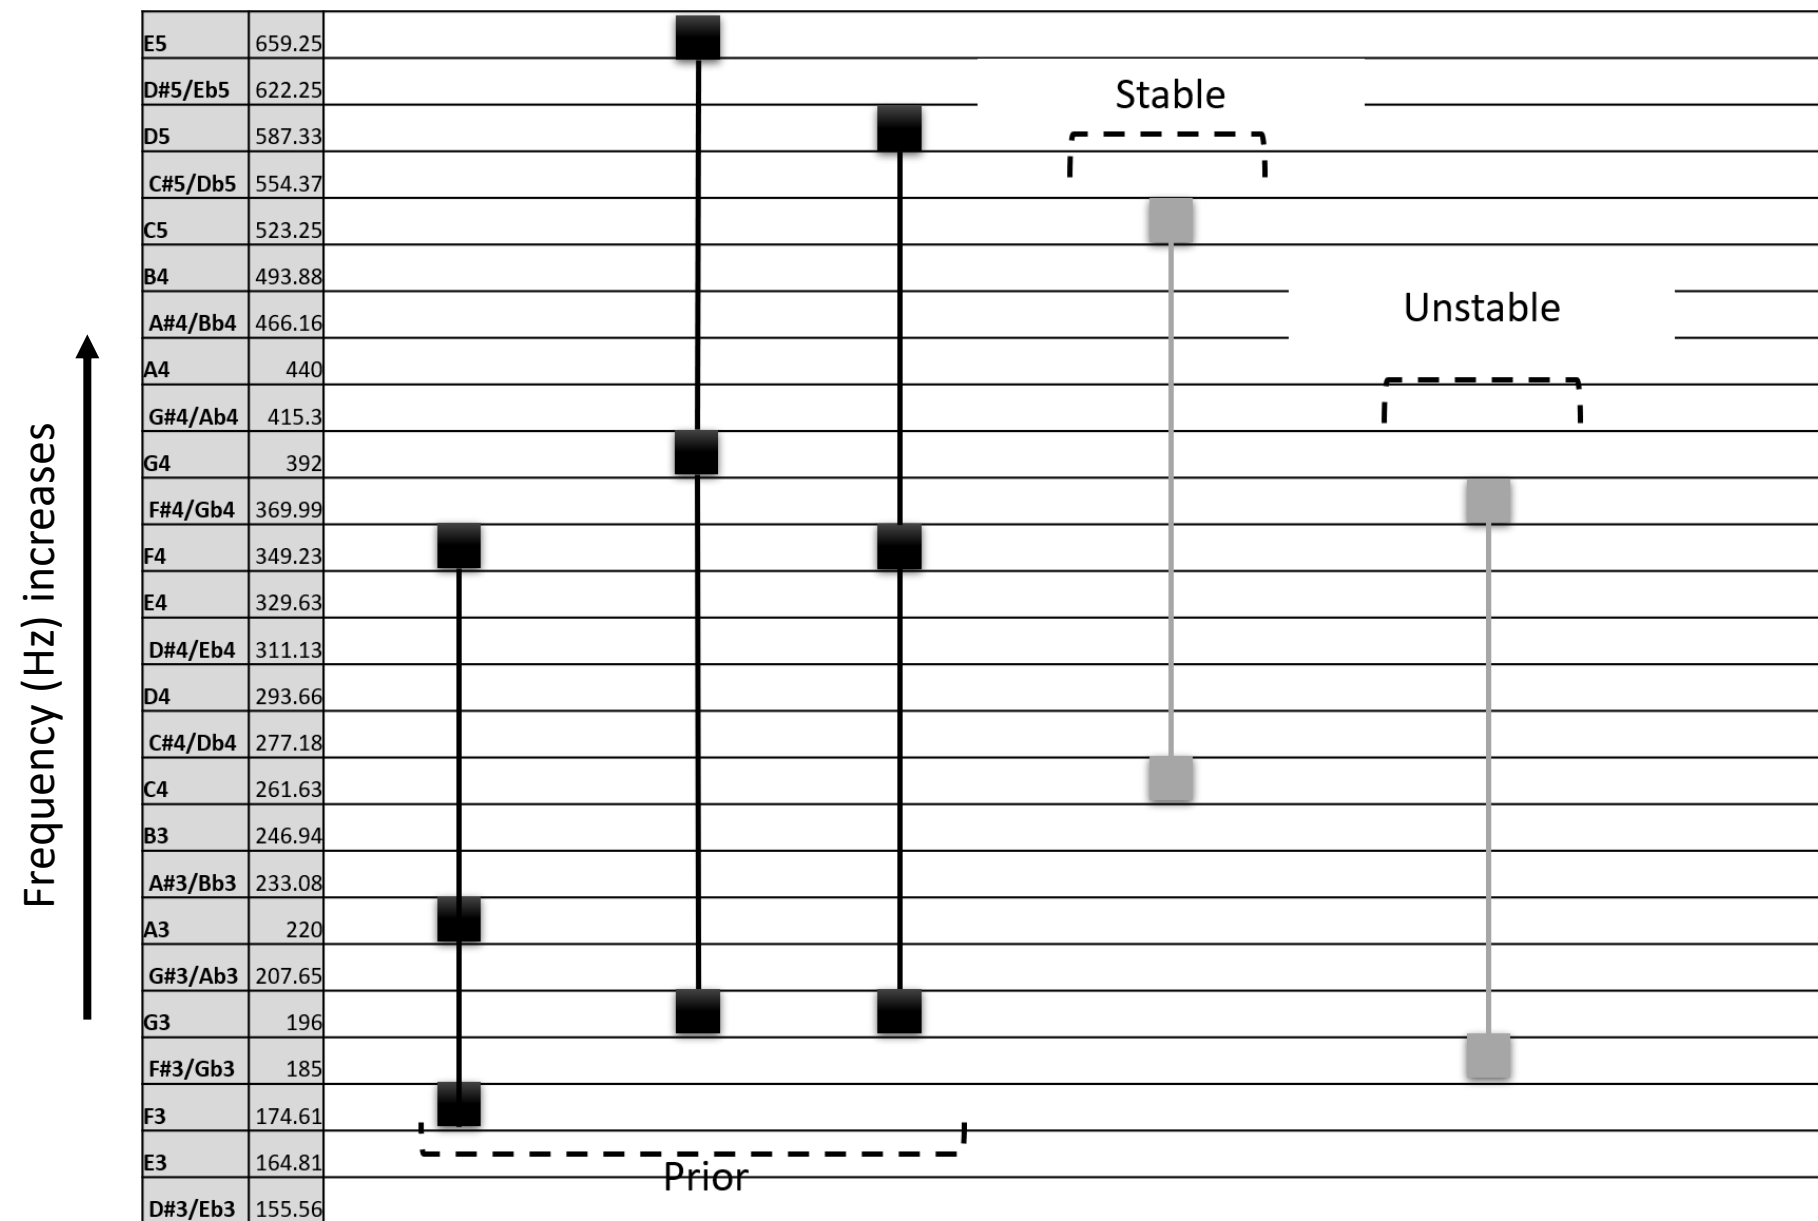

**Figure S3.** Schematic presentation of the auditory stimuli used in Experiment 2 (IAT method), in C Major (4A) and in C sharp Major (4B). Each black box is a note, and the lines connecting the notes create a chord. The example is in C Major and consists of prior (a sequence of three chords), followed by a stable note (C, first degree of the scale, most stable) or an unstable note (F#, the raised 4<sup>th</sup> degree, least stable). Note that while for the sake of clarity each tone is represented here by its fundamental frequency (F0) only, stimuli actually consisted of harmonic tones (piano timbre).

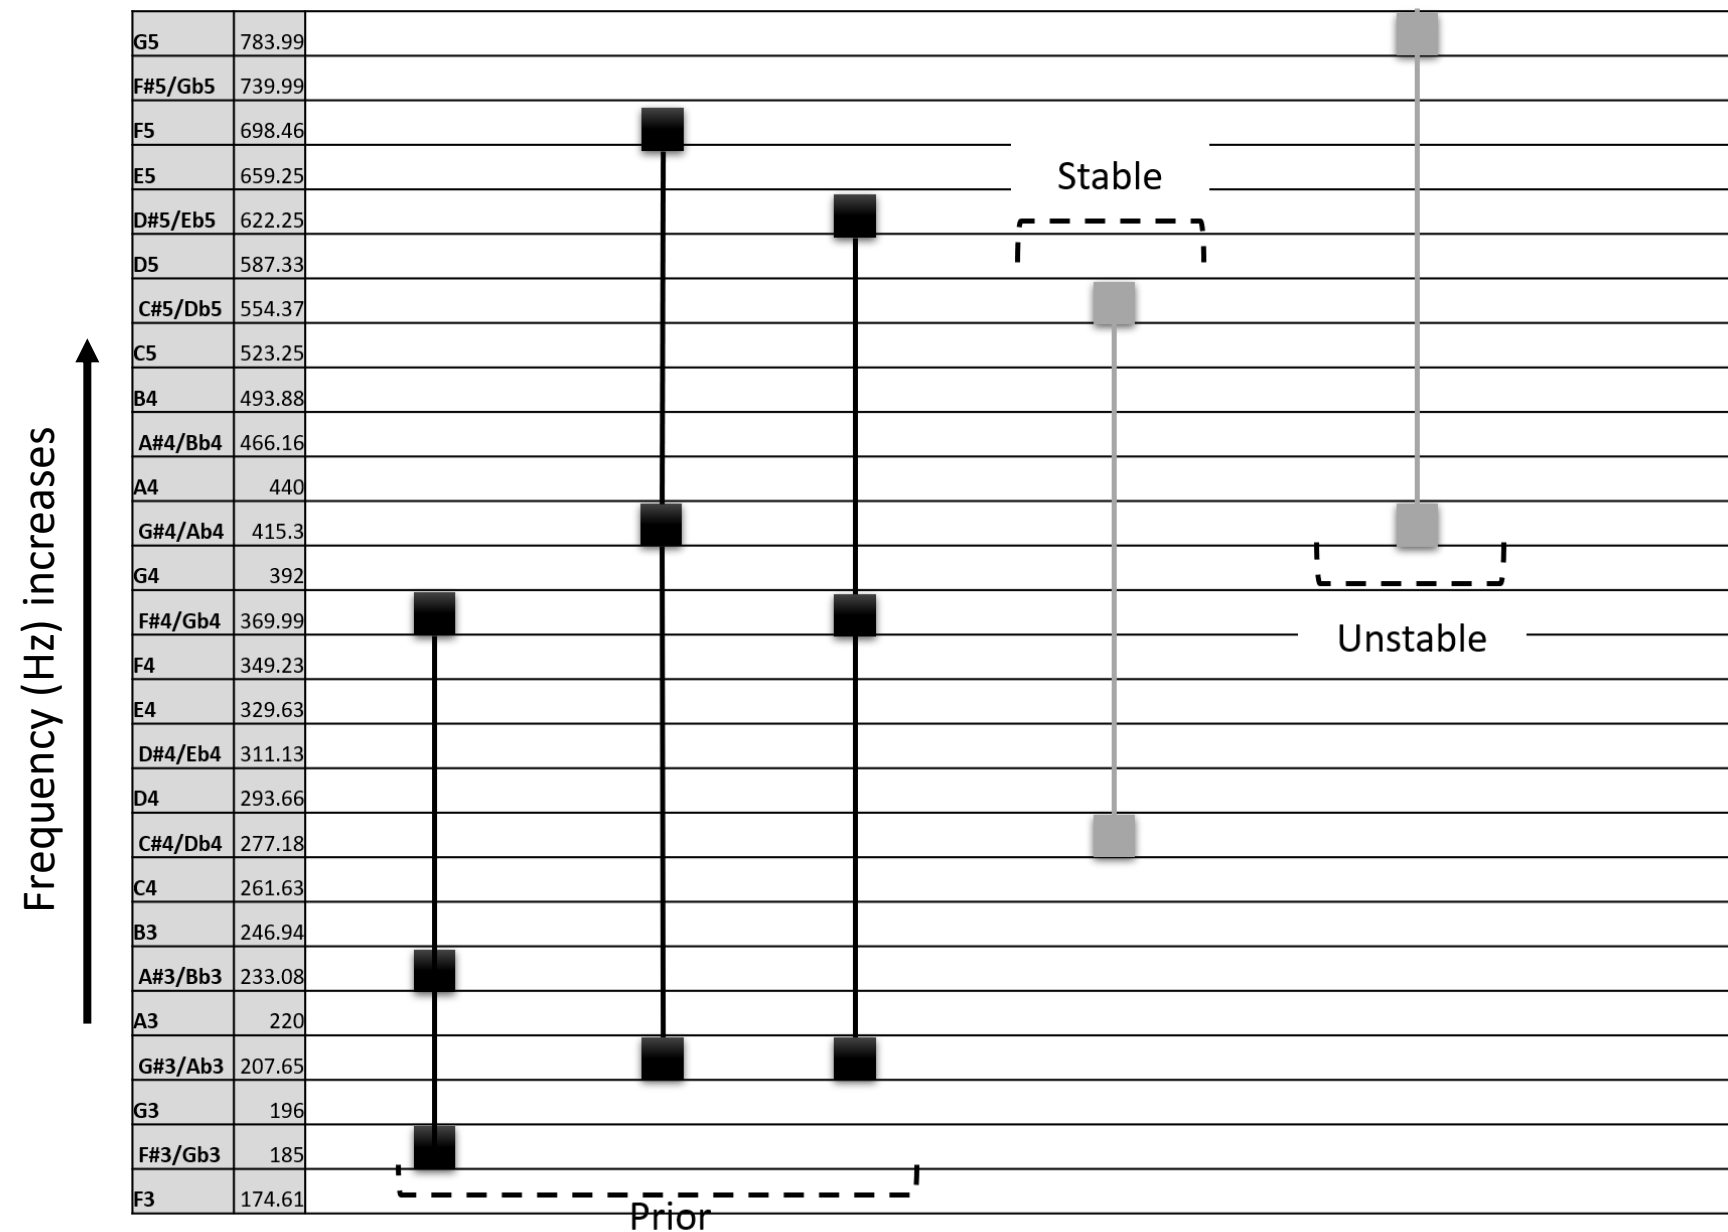

**Figure S4.** Schematic presentation of the auditory stimuli used in Experiment 2 (IAT method). Each black box is a note, and the lines connecting the notes create a chord. The example is in C sharp Major and consists of prior (a sequence of three chords), followed by a stable note (C sharp), first degree of the scale, most stable) and an unstable note (G, the raised 4<sup>th</sup> degree, least stable). Note that while for the sake of clarity each tone is represented here by its fundamental frequency (F0) only, stimuli actually consisted of harmonic tones (piano timbre).
